# Supplementary material
Source: Springer Nature journal article supplement (https://www.springermedizin.de/resource/supplementary/12882_2014_800_MOESM5_ESM.pdf/9454316)

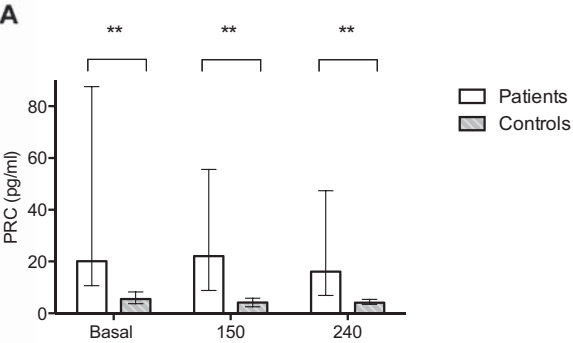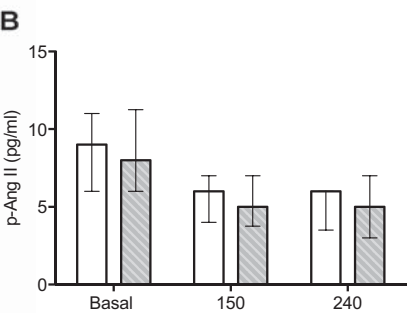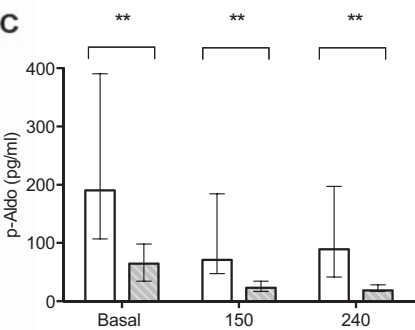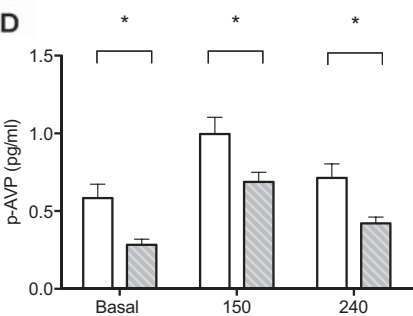

Supplement: MOESM5 [file 9454316]
